# Supplementary material for: Regional and seasonal truncation errors of trajectory calculationsusing ECMWF high-resolution operational analyses and forecasts
Source: Copernicus journal article supplement (doi:10.5194/gmd-2016-314), 2017-02-09
Supplement: Supplementary file [file gmd-2016-314-AC1-supplement.pdf]

# Reply to review comments

We thank the reviewers for the time and efforts spent on the manuscript. We considered all comments and hope that the revised draft properly addresses the remaining issues. Please find our point-by-point replies below (colored in blue).

## Reviewer #1

### 1 General

This paper investigates the performance of a number of numerical schemes to integrate the trajectory equation. This is done using the LPDM MPTRAC. As the code is prepared for parallel computing, the performance is investigated also as a function of the number of threads (for one of the schemes only). For the tests, 10-day simulations were carried out using ECMWF data with 16 km grid spacing, and results are presented for different regions of the globe, layers of the atmosphere, and seasons. This study is a useful addition to the previous investigations, as it also tests higher-order methods rarely used in atmospheric transport modelling, and as parallel performance is included. I recommend publishing it after consideration of the following remarks. I think that the authors have some choices with respect to doing additional calculations and/or evaluations, and I hope that they would be able to consider my respective suggestions, as the value of this work could be significantly increased in that way.

### 2 Major remarks

1. In my opinion, there is one aspect in the setting of the numerical experiments which is not ideal. The regular LPDM code has been used, that is, including a stochastic wind component to represent turbulence. Existing similar studies have been carried out with simple trajectory models. It is not very clear what the consequence of adding stochastic wind components is for the deviations between the schemes tested. The authors propose turbulence as explanation for several of the observed variations in accuracy, but this remains hypothetical. I would strongly recommend to repeat at least a subset of the simulations with all kinds of stochastic influences (turbulence, mesoscale fluctuations, convection if it exists in the model) switched off, present and discuss these results as well.

The simulations are based on the advection module of MPTRAC solely, the modules for turbulence and mesoscale fluctuations were turned off. We added this information to the model description.

2. Another open question is whether RK4 with 60 s time step is a suitable reference method. If one extrapolates the RK3 or RK4 curves in Fig. 8 (bottom), one would arrive at an AHTD value of about 100 km at 60 s (probably against a hypothetical perfect simulation). The time step has to be reduced until a further reduction does not reduce

AHTD significantly in order to establish a reference simulation. (I see that Hoffmann et al. (2016) claim that convergence already was reached at 120 s, but this is in obvious contradiction with the results reported here.) This might change the apparent relative benefits of higher-order methods.

Fig. 8 (bottom) illustrates the convergence for the troposphere, where truncation errors are higher than elsewhere. In fact, the northern mid latitudes slow down the tropospheric convergence. We agree that the AHTD for this particular region suggests that a shorter time step of 30 s might be a better choice. However, the other regions and especially the combined set of all parcels show convergence already for a time step of 60 seconds. The convergence analysis of Hoffmann et al. (2016) is not applicable to this study for two reasons: First, the horizontal resolution was increased from  $0.25^\circ$  to  $0.125^\circ$  in this study, which reduces the convergence rate. Second, the simulations of volcanic emission dispersion by Hoffmann et al. (2016) covered only the UT/LS region, and the results cannot be generalized to the troposphere.

3. As the authors rightly point out, higher-order methods are unlikely to bring much gain if we use linear interpolation. This points to another option for a potentially optimal trajectory calculation, at least as a reference method: Linear interpolation should allow to solve the trajectory equation analytically within a grid cell and between two times of wind field availability (cf. Seibert, 1993). Admittedly, the need to bound each calculation step at grid-cell borders has a potential to make this method a bit cumbersome and computationally probably less efficient.

A reference simulation using linear interpolation would indeed be suited as reference. As our computations do not use such a method, this would also potentially allow for a more solid comparison. However, implementation is complicated due to the implied transformation of spherical and Cartesian coordinates and computation costs are relatively high, so we decided to keep the RK4 reference for the current study.

4. Another methodological issue is the questions on which transport times the final evaluation of schemes should be based. Even though not explicitly mentioned, Fig. 8 seems to be made with results after 10 days. I don't think this is the most appropriate choice. As discussed in Sect. 3.2, there is a strongly non-linear growth of the deviations with time. This growth has nothing to do with numerical errors, it is solely a function of atmospheric flow patterns (diffluent flows or bifurcations). Thus, a longer calculation mainly amplifies initial deviations which are due to the different truncation errors. The longer calculations only mean more calculational efforts, and the true truncation errors are obscured by the increasingly important atmospheric flow influences, probably exaggerating the difference between atmospheric regions or seasons (note also that for example polar-region trajectories mostly leave the polar domain within the 10 days). Please also look at results with much shorter transport times and consider replacing the 10-day results by them.

Our intention was to give estimates for the total uncertainties of trajectory calculations

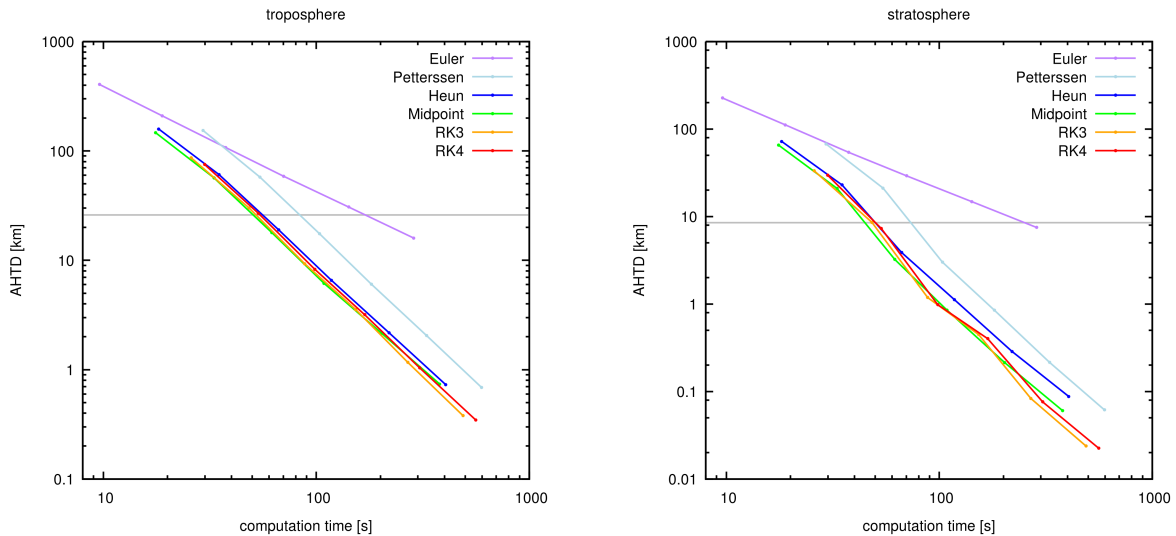

Figure 1: The figures show the efficiency of the used methods by relating the average error in specific altitudes after 24 h to the required computational time. The dots indicate the time steps from 3600 s on the left to 120 s on the right.

in different atmospheric conditions. We defined a limit for the spread of the parcels and wanted to find the cheapest method to adhere to the limit. However, to allow for distinction between initial truncation errors and those potentially perturbed by atmospheric influence, we added a Figure for the trade-off between computational accuracy and CPU-time after 1 day and discussed the results in Sect. 3.4 (see Figure 1 in this reply).

5. Finally, the results are certainly sensitive to the resolution of the wind field data. Results obtained for the specific case of 16 km / 3 h therefore cannot be generalized. Keeping in mind the conclusions of Stohl et al. (1995), Brioude et al. (2012), and Bowman et al. (2013), 3 h intervals for the wind fields are coarser than what would be desired at this horizontal resolution. As 1 h is provided by ECMWF, I am wondering why it was not used. This also diminishes the value of the results presented here, as most people would want to use the 1-h data if they go to the highest horizontal resolution. There would be a number of ways to produce more general results, such as trying out different resolutions or to parameterize the recommended time step by flow field properties such as (local) spatial and/or temporal derivatives at different orders.

Indeed, hourly operational forecast data can be downloaded from ECMWF since November 2011. However, the description of the operational products at <http://www.ecmwf.int/en/forecasts/datasets/set-i> implies 3-hourly forecast time steps for the first 144 hours of HRES operational forecasts. Similarly, the most recent (updated 2015) user guide to ECMWF forecast products available at [http://www.ecmwf.int/sites/default/files/User\\_Guide\\_V1.2\\_20151123.pdf](http://www.ecmwf.int/sites/default/files/User_Guide_V1.2_20151123.pdf) specifies the temporal retrieval of ECMWF forecasts as follows: ‘All forecast parameters, both surface and upper air, based on 00 and 12 UTC

HRES and ENS, are available at 3-hourly intervals up to +144 hours and at 6-hourly intervals from +150 to +240 hours.’ For the scope of this paper we decided to restrict ourselves to data with original and officially approved resolution only and therefore downloaded the operational forecasts with a forecast time step of three hours.

#### Specific and Minor Remarks

1. The title could be rephrased for example as ‘Truncation errors of trajectory calculations using ECMWF high-resolution data diagnosed with the MPTRAC Lagrangian particle dispersion model’

Following the suggestion we rephrased the title of the manuscript to: ‘Domain specific truncation errors of trajectory calculations using ECMWF high-resolution data diagnosed with the MPTRAC Lagrangian particle dispersion model’.

2. Page 1, line 1: Abstract. The abstract could be shortened by removing nonessential background and more concise wording.

The abstract has been shorted by removing some unnecessary or redundant background information.

3. Page 1, line 4: kinematic equation of motion (comes also in other places). I dont feel comfortable with this wording. ‘Equations of motion’ for me would refer to the Euler or Navier-Stokes equations. Why not call this the trajectoy equation?

We think that the term ‘kinematic equation of motion’ is correctly used for Eq. (1). We do not intend to change the wording.

4. Page 2, line 6: Lagrangian particle dispersion models have proven. Under this chapeau, next to real LPDMs, LAGRANTO is listed which is a simple trajectory model and not an LPDM. I think it does no harm to enumerate it here, but not under a category that doesnt fit (and there is no reason to focus specifically on LPDMs here, as the truncation error problem occurs in the same way in trajectory models).

Our focus is on LPDMs, which is now also visible in the updated title of the study. Therefore we decided to skip the reference to LAGRANTO in the introduction but changed slightly in our conclusions: *Page 14, line 32: All integration methods discussed here are in principle suited and have been used for Lagrangian Particle dispersion and trajectory model simulations.*

5. Page 3, line 3: The T1279L137 ECMWF operational analysis data used here have 16 km effective horizontal resolution, about 180 - 750m vertical resolution at 2 - 32 km altitude, and are provided at 3 h synoptic time intervals. ‘Provided at 3 h ... ’ is not entirely correct - it is your choice. Analyses are available every 6 h and forecasts at steps of 1 h. It would be useful if you indicate what composite of AN and FC fields you were using here and not on the next page.

ECMWF analyses are produced every 6 hours, but forecasts are only calculated from

the analysis base times of 00 and 12 UTC. Thus we decided to use analyses at 00 and 12 UTC and the corresponding forecasts in between, as described on page 4, lines 5-6. To our opinion such detailed information does not belong to the introduction. Concerning the 1 h forecast steps, please refer to our reply to major remark #5.

6. Page 3, line 7: LPDM studies using this new data set. It is not clear what you mean by ‘this new data set’. Obviously, ECMWF rules will not allow to make the ECMWF data set that you have used here available for general use.

We rephrased the sentence: *Page 3, lines 6-7: Using most recent meteorological data, the results will be of interest for many current and future LPDM studies using ECMWF operational data or data sets with comparable resolution.*

7. Page 3, line 26: meteorological wind fields. Just wind fields should good enough. If the model uses other fields as well (e.g, thermodynamic or surface fields), please explain in more detail. I am also wondering whether the model considers convection – it is invoked as a possible explanation later, but in Hoffmann et al. (2016) I did not find a reference to convection being a simulated process (if it isnt, it should also not be invoked). Maybe you want in general to provide a little bit more information about the model, especially considering that the only paper published so far is not open-access.

We rephrased this as suggested. Our model does not consider convection. In the text we refer to convection patterns visible in the meteorological input data. Note that more information on the MPTRAC model can also be found in Heng et al. (2016), which is referenced in our manuscript.

8. Page 3, line 31: While atmospheric reanalyses... typically have a horizontal resolution of  $\sim 100$  km or less, the resolution of operational forecast products has been continuously improving during the last decades. Reanalysis products resolution has improved as well! And better write ‘ $\approx 100$  km’ ( $\backslash$ approx) or ‘ca. 100 km’ to not confuse with symbol for proportionality (symbols appear also on p. 7 and p. 10).

While it is true that also the resolution of global reanalyses has been improved over time, this has not been done as often as for the operational products. E.g., from ERA-15 (1996) to ERA-INTERIM (2011) the resolution of the ECMWF reanalyses has improved from  $1.125^\circ$  to  $0.7^\circ$  and from 31 to 60 vertical levels, while for the atmospheric operational analyses the resolution has improved from  $0.56^\circ$  to  $0.14^\circ$  and from 31 to 91 levels over the same time frame. Symbols for approximation have been changed throughout the text.

9. Page 4, line 4: For usage with MPTRAC, the wind fields have been interpolated horizontally to a longitude-latitude grid. Have they really been interpolated (from another, e.g. reduced Gaussian, grid), or were they just extracted at the given grid through MARS (by evaluation of the spectral data)?

Wind data on model levels have been directly extracted from MARS by indicating the desired horizontal resolution. The interpolation on pressure levels has been performed by using the model to pressure level interpolation operator ml2pl from the Climate Data

Operators (CDO).

10. Math vector notation: You are using upright bold letters for vectors. Standard notation would italic bold, accessible (with the `amsmath` package) for example through `\boldsymbol{text}`.

The notation has been changed accordingly.

11. Page 6, line 4 ff.:  $k_1 = \dots$  It seems that you define certain velocities as  $k$ . It is very unusual to denote a velocity by  $k$  and not with a letter such as  $u$  or  $V$ , upper-or lowercase, and even more difficult as you don't give an explanation in words of these variables.

The vectors  $k_i$  are just auxiliary vectors at different nodes of the integration schemes, for which 'k' may be an acceptable choice of notation. The definitions of these vectors in Eqs. (7) to (15) make clear that wind vectors are meant. Calling the vectors  $u$  or  $v$  may cause confusion with the wind function that is already called  $\mathbf{v}$ . We kept this as is.

12. Page 8, line 5, 8: 5 latitude bands, 3 altitude layers. According to standard typesetting rules, numbers less or equal to twelve in running text should, in general, be written out (same for '2nd/3rd-order' elsewhere).

This has been fixed throughout the manuscript.

13. Page 11, line 30: land surface ratio. I guess that 'land-surface fraction' is meant.

This is correct. We changed the text accordingly.

14. Page 11, line 30: The tropospheric mid-latitudes were expected to cause the largest errors, because the most complex wind systems occur in this region due to a larger land surface ratio and more complex orography. The distribution of continents and orography is relevant for the difference between the mid-latitudes of the two hemispheres, but not for differences between mid-latitudes and elsewhere - this latter effect is due to the structure of the global circulation which in the end is caused by the poleward increase of the Coriolis parameter, allowing for Rossby waves and baroclinic instability to occur there.

We would like to pick up the remarks of both reviewers to clarify our view on the errors occurring in the mid latitudes. In the original manuscript a hint to the meandering jet streams and the baroclinic structure of the atmosphere was missing, which is a important source of transport errors in our simulations for the mid latitudes. Text on page 11 has been changed as follows: *Page 11, lines 27-30: The troposphere has its largest errors at northern mid-latitudes with errors between 245 km and 470 km. Tropospheric mid-latitudes were expected to cause relatively large errors because of the nature of global circulation: Rossby waves and baroclinic instability occurring predominantly in this region come along with highly variable wind patterns. In addition, the evolution of northern mid-latitudes meteorological systems is more difficult to simulate than for the southern mid-latitudes due to the larger land-sea ratio and more complex orography of the northern hemisphere. The errors in the polar regions... Page 11, lines 32-34: The UT/LS region has its largest AHTDs in the northern mid-latitudes with 95 km to 177 km. These errors are caused by*

*the north-south meandering of the jet (Woollings et al., 2014) and higher turbulence in the underlying region. The second largest...*

15. Page 12, line 1: The south pole has the smallest errors. Probably you want to say that the smallest errors were found over Antarctica / the southern polar region.

We replaced ‘South Pole’ by ‘Antarctica’.

16. Page 12, line 5: The relative high errors in the tropics are probably caused by a stronger turbulence in that region. The lower bound of the stratospheric region of our test cases is 16 km, since the tropopause reaches an average altitude of 16 km near the ITCZ, turbulent movements due to deep convection can occur more frequently in the lower stratosphere above the tropics. Is turbulence due to convection resolved in MPTRAC? If not, it cant be invoked as an explanation here.

The term ‘turbulence’ was misleading in this context, we intended to refer to the grid-scale fluctuations that are given in the meteorological input data.

17. Page 12, line 9: During northern hemisphere wintertime land-sea temperature differences as well as the temperature gradient between the North pole and the equator are largest, which allows for more intense and complex dynamic patterns to occur than in summer. I would not refer to the meridional temperature gradient as the pole-equator temperature gradient – the pole is a single point and neither the pole nor the equator typically represent the locations of the extreme temperatures. Furthermore, the baroclinicity in mid-latitudes rather depends on the subtropical region temperatures than on equatorial ones.

On page 12, lines 8-10, we replaced ‘North Pole’ by ‘Arctic’ and ‘Equator’ by ‘subtropical regions’.

18. Page 12, line 12: We need to stress that each simulation lasts only 10 days, which is a relatively short time interval to analyze seasonal effects. Fast temporal variations and changes in medium-range weather patterns can blur out the impact of seasons that is observed here. To better resolve the seasons you dont need longer trajectories, but more frequent starts or more years. I any case, I dont think that the seasonal effects are so interesting, you could discuss this just briefly. It is obvious that stronger variations in the wind fields will lead to larger truncation errors, and the dependence of the variability of wind fields on the seasons is well known.

We skipped the term ‘seasonal truncation errors’ from the title of the revised manuscript. Consequently, we changed the title of Sect. 3.3 to ‘Regional and temporal truncation errors’ in order to include both seasonal and intra-annual effects. The section on seasonal dependencies itself is already very short.

19. Page 12, line 27: Vertical transport deviations are about 800 - 1000 times smaller than the horizontal transport deviations. As the atmosphere in general is anisotropic ( $L \approx 10,000$  km,  $H \approx 10$  km), this is trivial and not worth mentioning.

We omitted this as suggested.

20. Page 12, line 35: The median error gets somewhat larger in the troposphere, where particle paths are more likely being affected by atmospheric turbulence. Hoffmann et al. (2016) says that MPTRAC uses the same diffusivity throughout troposphere and stratosphere. How is this compatible?

See reply to major remark #1.

21. Page 13, line 15: As an example, Fig. 7 shows results of scaling tests using the midpoint scheme with a time step of 120 s for different numbers of particles and OpenMP threads. It would be useful to explain why you are only testing OpenMP and a single node if MPTRAC is capable to work on distributed-memory systems as well.

We added the following sentence in Sect. 3.4: *The MPI parallelization is only used for ensemble simulations, which are conducted independently on multiple nodes. Therefore, the scalability of the MPI parallelization is mostly limited by I/O issues, which are out of scope of this study.*

22. Page 13, line 18: the computing time is limited by an offset of ... s, which is due to the overhead of the OpenMP parallelization. Language-wise, I would prefer to speak about showing a plateau rather than ‘being limited by an offset’. Do these times refer only to the time spent in the trajectory calculation, or to the model as a whole? In the latter case, there is not only overhead from parallelization but also from other parts of the model (the minor plateau even with a single a single thread seems to indicate some contribution.) One is also wondering here about your parallelization strategy – is there a barrier after each time step? Is that needed?

The time measurements refer only to the part of the code spent in the advection module of MPTRAC. Due to the operator splitting approach used by our model, an OpenMP barrier occurs after the call of each operator (or ‘module’ of MPTRAC) and after each time step. Future work may focus on ‘pipelining’ of the operators, but this would require a major revision of the structure of our model. We will replace the word ‘offset’ by ‘constant contribution that can be attributed to the OpenMP parallelization overhead’.

23. Page 13, line 23: It is also found that the code provides additional speedup if the simultaneous multithreading capabilities of the compute nodes are used, in particular for very large numbers of particles (on the order of  $10^6$  to  $10^7$ ). For smaller number of particles ( $10^4$  or less) the speedup is limited due to the overhead of the OpenMP parallelization and by the limited work load of the problem itself. This is an interesting part of your results, but I dont agree completely with your description and interpretation. There is always a drop at first when the number of threads exceeds the number of 24 cores, which is quite typical (see also the indications given in your footnote source). The interesting feature is that for a large enough number of particles, it then rises again. Maybe your computing specialists have more detailed insights for this behaviour? Also, I was wondering why for the largest number of particles the first maximum is reached with 20 threads. Is this a



plotting error, or is this related to memory access? We should also note some irregular behaviour for moderate numbers of particles toward the maximum number of threads.

We consulted the IT experts at our center to get more information. According to their analysis, limited scalability (or ‘drops’ in speed-up) can be assigned to load imbalances. Our model implicitly uses a ‘static’ schedule for the OpenMP loop parallelization. For instance, for  $10^6$  particles on 28 threads there will be 4 cores that have to process two packages of 36 k particles using hyper threading (HT) while the other 20 cores only process one package without HT. This implies a significant load imbalance compared to a more balanced scaling using 24 threads, which corresponds to the number of physical cores. Nevertheless, speedup results at 48 threads compared to 24 threads show that running with HT is 45% more efficient than without.

24. Page 13, line 33: Among the 2nd-order methods the Petterssen scheme has the lowest computational efficiency, which is due to the fact that we tuned the convergence criteria for this method for accuracy rather than speed. So, it is not ‘the Petterssen scheme’ but your implementation of this scheme for which the statement holds! That is a bit of a pity, so we dont know how the Petterssen scheme would do with a more reasonable cut-off of the iterations. As this is quite a relevant issue, and some people might only look at the figure without reading the full text, I suggest to mention that also in the figure caption (or better do some more realistic tests for a revised version).

The Petterssen scheme with many iterations did not give significantly more accurate results than the second order methods, which include Heun’s method, which is equal to the Petterssen scheme with one iteration. Therefore no further analysis of intermediate configurations was made. However, we share your concern and added the following note to the caption of Fig. 8: *Note that our implementation of the Petterssen scheme was optimized for numerical accuracy rather than speed.*

25. Page 14, line 1: The best efficiency, i. e., the best accuracy at the lowest computational costs, is mostly obtained with the midpoint and RK3 methods. This wording is not providing an operational definition of ‘best efficiency’, as best accuracy and lowest computations cost are mutually exclusive and you are not defining how exactly you want to measure the efficiency. A suitable measure would be the computation time to achieve a given AHTD. Do this for a value that is reasonable and then quantify the computation times, as just reading them out from a log-log diagram is not so easy (note also the unexplained minor tick intervals better use a full set of them). Thus, you may want to combine this paragraph with the following one. For the rating of Petterssen (vs. midpoint), see above. Another question which needs to be answered is with how many threads this result was obtained, and whether there is any difference between schemes with respect to speed-up.

The most efficient method was detected as suggested by the reviewer, and this has been made more clear in a revision of this paragraph. The computation used 48 cores and the methods profit differently from the parallelization. Figure 2 in this reply shows the relative

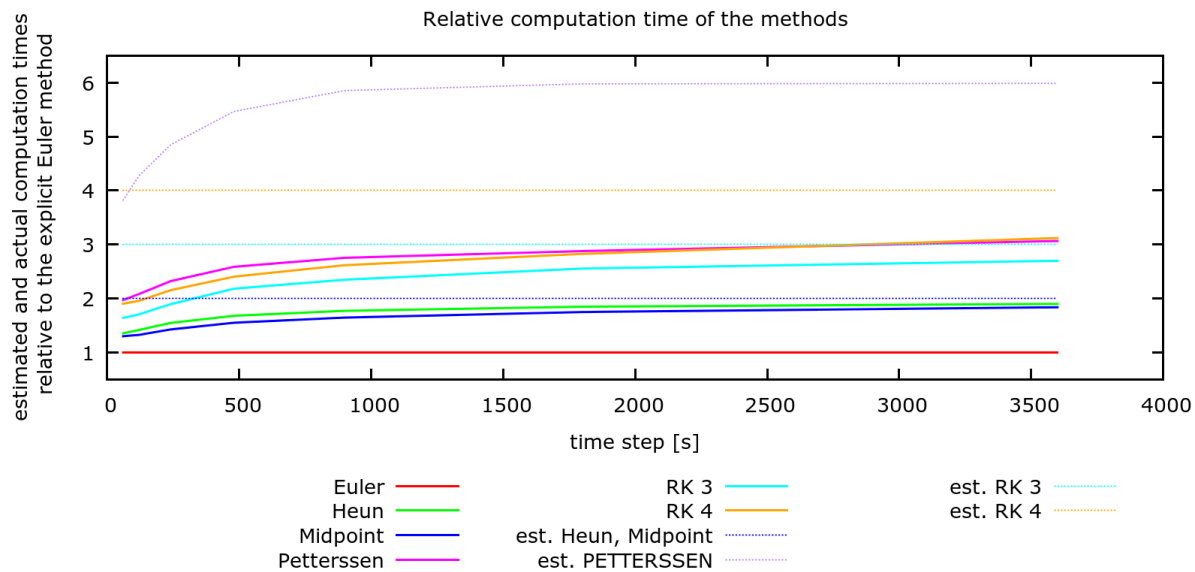

Figure 2: Relative computation time of the methods. The estimated times are based on the assumption that the time scales linearly with the number of calls to the wind interpolation function.

computation time of the methods in comparison to the Euler method. Theoretically there should be a linear dependency between computation time and the number of calls to the wind interpolation function (which is the most expensive part of the advection module). However, the higher order methods, which call to the wind interpolation more often, are faster than this estimate for the computational time. Note that the maximum number of iterations for the Petterssen scheme was six, which explains the plateau. We contribute the better speedup for more computationally expensive methods to cache usage, since the wind interpolation probably considers some grid points more than once, such that elements can be read from the cache instead from main memory. However, this makes the RK4 and Petterssen scheme even less attractive, since the computation time would be even larger without higher parallelization speedup.

26. Page 14, line 17: with an effective horizontal resolution of about 16 km. Mention also the 3 h here!

The information about the temporal resolution has been added accordingly.

27. Page 14, line 18: The truncation errors of the schemes were found to cluster into three groups that are related to the order of the method. Add ‘for a given time step’.

This has been added accordingly.

28. Page 14, line 25: We attribute this to larger small-scale variations caused by atmospheric turbulence and mixing in the troposphere. The first part of the explanation

is correct, but the second part not. These variations are not caused by turbulence (16 km is not turbulence scale !!) and certainly not by mixing (this would reduce and not amplify variability!).

We omitted the wrong part of the explanation.

29. Page 14/15, line 336: [whole para]. I suggest to rephrase this paragraph in line with the remarks made above for Sect. 3.4, making sure it clearly conveys the relevant facts and definitions.

The paragraph has been rewritten taking into account your remarks #21 to #25.

30. Page 15, line 7-9: The study of Seibert (1993)... . To achieve truncation errors that are smaller than overall trajectory uncertainty, they found that the time step should fulfill the CFL criterion as a necessary condition for convergence. The recommendation there for a sufficiently small truncation error was 15% of the time step needed for convergence of the Petterssen scheme. If we assume that the reference accuracy has also improved in the meantime, an even smaller value would result. The CFL criterion is recommended to make sure that no small-scale features are skipped, not for convergence of the iterations in the Petterssen scheme.

We adjusted the paragraph according to your comment and added the following: *Page 15, line 9: Their recommendation for a sufficiently small truncation error was 15% of the time step needed for convergence of the Petterssen scheme. Assuming that the reference accuracy has improved in the meantime, an even smaller value would result. The CFL criterion is used to make sure that no small-scale features are skipped.*

31. Page 15, line 19: However, the large variability of regional and seasonal truncation errors found here suggests that applications may benefit from more advanced numerical techniques. Adaptive quadrature could be an interesting topic for future research. Note that adaptive time steps have been recommended by Seibert (1993) and were used already in the 1980ies for atmospheric trajectories by Maryon and Heasman (1988) and Walmsley and Mailhot (1983).

We made a reference to the mentioned studies: *Page 15, lines 18-19: However, the large variability of regional and seasonal truncation errors found here suggests that applications may benefit from more advanced numerical techniques. Adaptive time stepping as recommended by Seibert (1993) was used already in the 1980s for atmospheric trajectories by Maryon and Heasman (1988) and Walmsley and Mailhot (1983). Such an adaptive quadrature could be taken up for future research.*

32. References: For Hoppe et al. (2014), quote the final paper and not the discussion version.

The reference has been updated in the final manuscript.

33. Figure 1: I would suggest to use the same scale for all pressure levels. I am wondering why odd pressure levels are used (32.6, 180, 488 hPa) instead of standard levels.

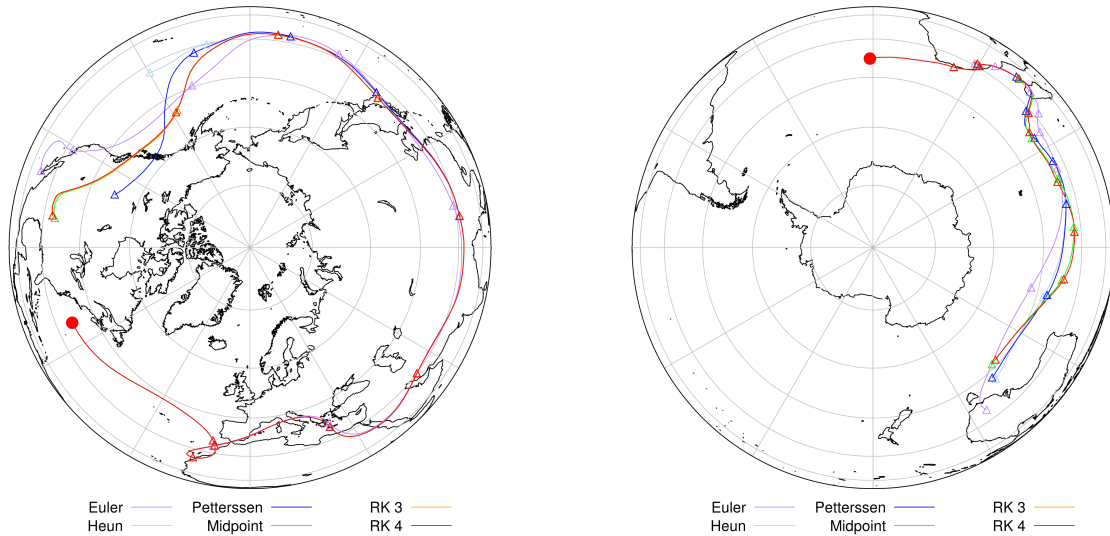

Figure 3: Examples of trajectory calculations using different numerical integration schemes. Circles mark the starting positions of the trajectories. Trajectories were launched at an altitude of 10.8 km (left) and 9.7 km (right). The starting time is 1 January 2014, 00:00 UTC in both examples. Triangles mark trajectory positions at 0 UTC on each day.

And I would suggest to reverse the colour coding for vertical velocity – meteorologists would find it more natural letting blue denote subsidence and red upward motion.

For better visibility of the circulation patterns we decided to use different scales for the three pressure levels. In case of vertical velocities the maximum values differ by more than a magnitude between the levels. The chosen pressure levels are used in the model and correspond closely to the altitudes given in the figure caption. The colour coding for vertical velocity has been reversed following comments by reviewer #2.

34. Figure 2: I don't deem this figure necessary. If you want to keep it, use an appropriate viewing position in the projection for the Northern hemisphere, presently we are looking from a point located somewhere above the South pole, like peeking through the ground, not down from space! Also, use hollow symbols of different shapes so that we can easily recognize coincident positions as such.

We corrected the projection error and changed the symbols (see Figure 3).

35. Figures 3 ff.: It would help the reader if you annotate subfigures or at least columns of subfigures.

This will be done during copy-editing.

36. Figures 5 and 6: This figure should be simplified. You don't need to show the two years separately, and I think you also don't need to show seasons separately. Thus you could have just three subfigures (three levels) and the five regions inside of each one. Then

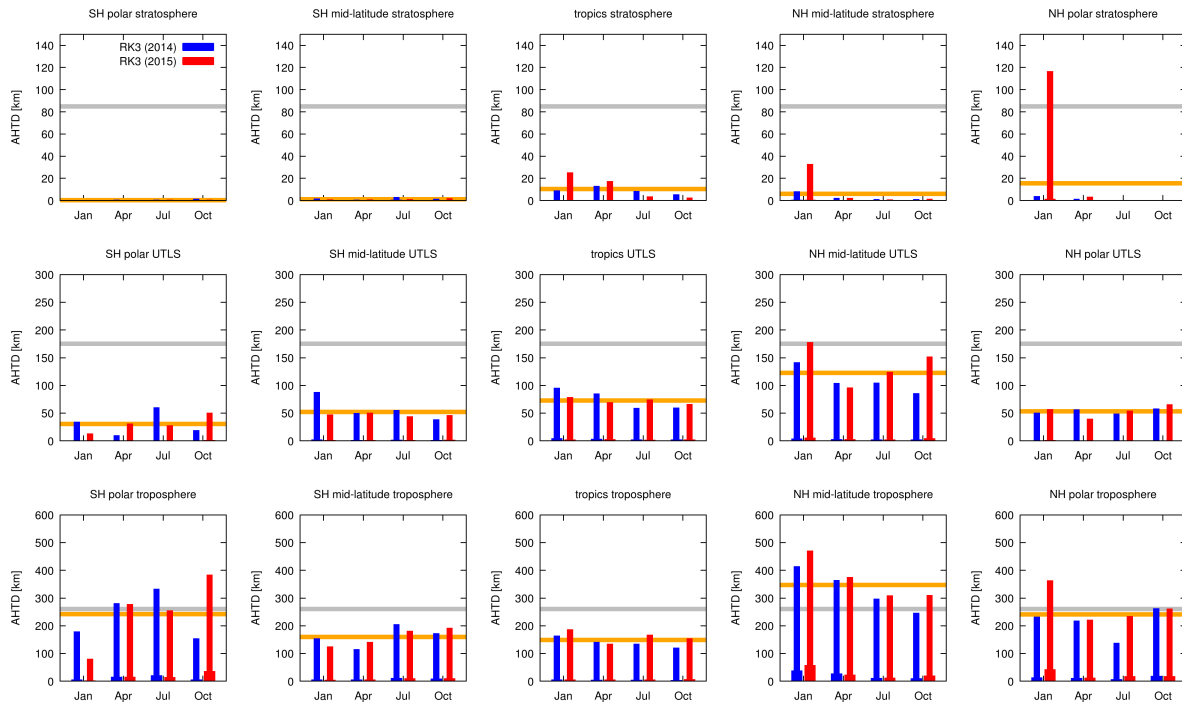

Figure 4: Average and median horizontal transport deviations after 10 days in different regions for the RK3 method. The orange horizontal line represents the average of the domain. The gray horizontal line indicates the error limit.

use a log scale for the AHTD, and symbols instead of bars (which will bring out the median also more clearly).

We would like to show the simulation results separately because regional and temporal impacts on the error were a part of the motivation for this study. We added a horizontal line for the average error to all subfigures (see Figures 4 and 5). We did not use a log scale, because it would hide the seasonal and regional differences.

37. Figures 2, 3, 4, 7, 8: Please make sure that line width, colour intensity and marker size are sufficient to read all the content easily.

We tried to improve the figures accordingly.

38. Using an enlarged printout of the lower part of Fig. 7, I tried to figure out the number of cores which works fastest as a function of the number of particles. I arrived at something like this:

```
#particles #threads remark
<50 1
50 - 200 4
```

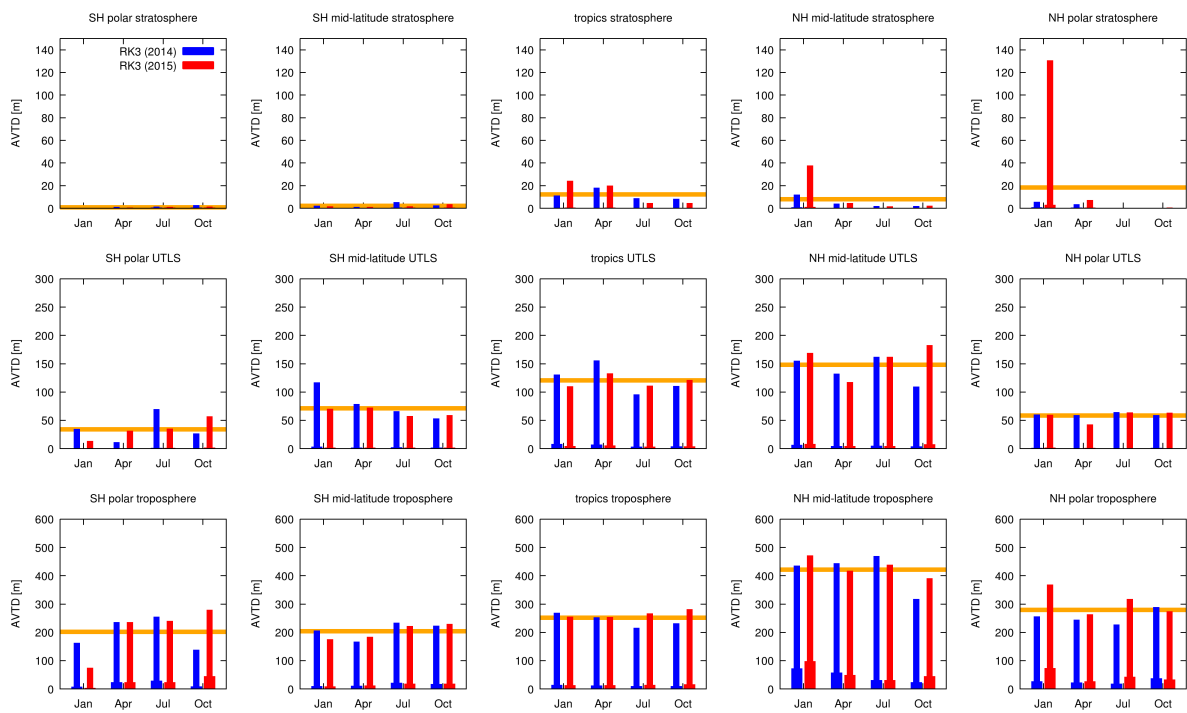

Figure 5: Average and median vertical transport deviations after 10 days in different regions for the RK3 method. The orange horizontal line represents the average of the domain.

200 - 300 8 very small interval!

300 - 1000 16

1,000 - 50,000 24 = #cores!

> 50,000 48 = max. #threads

I think that this evaluation would be useful for users. What is really striking is the fact that only (integer) powers of two show up as recommendable number of threads until 16. Then we can add 8 to arrive at the maximum number of cores (the question is open whether on a 32-core machine, 24 would show up or not), and then we can double once with hyper-threading. This is really a lesson for users, and if you have IT colleagues who are able to relate this behaviour to the hardware layout of your nodes, it would be even more useful.

This is a helpful evaluation and we added a statement in the paper summarizing the findings regarding the number of threads providing the minimum computation time with respect to the number of particles. Unfortunately, our IT experts were not able to provide a simple explanation of how the number of threads is linked to the hardware layout. The findings may depend specifically on the computing architecture and should not be generalized too much.

39. Page 15, line 20: Code and data availability. - ECMWF data (of the kind used here) are not simply 'distributed' by the centre. In general they would be available only for member-state NMS (or institutions authorized by them) and special-project holders. I suggest that the limited availability of these data is indicated. (I also thought that data provision could be mentioned in the acknowledgements.) - It would be useful to indicate the availability of the preprocessor which transforms ECMWF data to MPTRAC input data. - Does the version of the MPTRAC code available on github include the variety of integration schemes used here? If not, please make a statement about their availability. - It would be useful to provide the starting points of the trajectories as supplementary material so that the calculations become more reproducible.

There are several options to obtain ECMWF operational data, all of them are described in <http://www.ecmwf.int/en/forecasts/accessing-forecasts>. We crated a separate repository containing the MPTRAC code for the various integration schemes as well as the starting points of the trajectories. Section 5 has been changed as follows: *Page 15, lines 18-19: Operational analyses and forecasts can be obtained from the European Centre for Medium-Range Weather Forecasts (ECMWF), see <http://www.ecmwf.int/en/forecasts> (last access: 3 May 2017) for further details on data availability and restrictions. ECMWF data have been processed for usage with MPTRAC by means of the Climate Data Operators (CDO, <https://code.zmaw.de/projects/cdo>, last access: 3 May 2017). The version of the MPTRAC model that was used for this study along with the model initializations is available under the terms and conditions of the GNU General Public License, Version 3 from the repository at <https://github.com/slcs-jsc/mptrac-advect> (last access: 3 May 2017).*

## Reviewer #2

Synopsis:

In their study the authors look at the truncation errors of six explicit integration schemes of the Runge-Kutta family. The performance is studied based on real-case data from the operational ECMWF analysis and forecasts, whereby the sensitivity with respect to the sphere (troposphere, UTLS, stratosphere) is discussed. Further, the seasonal dependence of the errors is compared, and the computational efficiency is discussed. The paper is very well written, the argumentation very clear, and the number and quality of the figures support well the discussion. I think the paper fits well the interests of the GMD readership, and therefore I certainly can recommend its publication. Still, the authors might want to address the following concerns.

Concern:

1) The abstract (and manuscript) ends with a rather strong conclusion: "we recommend the 3rd-order Runge Kutta method with a time step of 170 s or the midpoint scheme with a time step of 100 s for efficient simulations of up to 10 days time based on ECMWFs high resolution meteorological data." This is, as the authors note, far below the time step that typically is applied in trajectory calculations based on ECMWF fields. I think the authors can clearly demonstrate that such a small timestep is indeed necessary to get a high degree of accuracy of a single trajectory – where the convergence of the trajectories is assessed based on the AHTD and AVTD distance metric. However, I wonder whether we should trust any single trajectory anyway. Let me make my point more clear: Suppose that we have a calculated a single trajectory which reaches after 10 days a AHTD(single) of 100 km. Hence, the trajectory calculation is not perfect. But now also assume that we very slightly change the starting position of the trajectory and repeat the trajectory calculation. We can now compare the distance between the initial and shifted trajectory, and the resulting metric is AHTD(single-shifted) = 200 km. Of course, we could repeat this kind of experiment with several shifted starting positions. The point is that the AHTD(single) can now be seen in a better light, because it is smaller than the inherent spread AHTD(single-shift) due to a minor shift of the starting position. I would argue that the uncertainty of the single trajectory is negligible compared to the flow-inherent dispersion of the trajectories. In short, I think that there is not too much meaning in considering single trajectories at all. We always have to look at an ensemble of trajectories started from nearby positions. The coherence of this trajectory ensemble then defines the time horizon until the trajectory is meaningful. Of course, there is also some subjectivity in this argument: The slight shift in starting positions has to be specified. Still, I think the authors should comment on this 'coherent trajectory bundle vs. single trajectory' concept.

Usual simulations with MPTRAC follow your approach and many parcels are randomly distributed around a starting point. Alternatively, in this study many different starting points are used, such that the impact of the average atmospheric conditions of the domains



on the error can be estimated. The analysis of the error would become very costly, if groups of parcels were created for each starting point. We tried to show that deviations of individual trajectories are not very meaningful by additionally computing the median deviation of the parcels. However, our impression is that the AHTD/AVTD metric is the common method for trajectory evaluation and we wanted to make the results comparable to existing studies. Also, with this setup, we wanted to reach convergence for the trajectories to compare the errors of different methods.

2) In Figure 5 the winter 2015 stands out. The authors find a reasonable explanation for it: a sudden stratospheric warming and near splitting of the polar vortex. I think this explanation makes perfect sense, and actually points to a potentially interesting extension of the study. In fact, we can expect a varying degree of inter-annual variability not only in the stratosphere, but also in the troposphere and in the UT/LS. There are years with more or less cyclones passing along the storm tracks; there are years where the jet stream in the UT/LS meanders more than in other years (with a more zonal jet). This variability is reflected in climate indices (e.g., the NAO), but it could also be assessed by explicitly 'counting' the cyclones, anticyclones, or by considering a measure of jet zonality. In short, it would be rather interesting to see the trajectory accuracy in context of this inherent tropospheric, UT/LS, and stratospheric flow variability. I don't expect the authors to do that all in the current study! But, possibly they can think about it, and thus link their findings more to meteorology than 'abstract' statistical measures. If appropriate, I would appreciate if the authors comment on this perspective in their study.

We would like to thank the reviewer for bringing up this interesting starting point for further research on trajectory accuracy in context of inter-annual variability of tropospheric and stratospheric atmospheric flow. Indeed, we did not expect such large variations between two NH winters in the first place and it would be intriguing to extend such a study to multiple years once input data at sufficient and constant resolution will be available.

Minor comments:

-P2,L25: "However, it needs to be stressed that appropriate ..." → "However, the appropriate ..."

Text has been changed accordingly.

- P3,L1,3,4: Three sentences starting with 'We' - please rephrase!

Text has been rephrased.

- P4,L12: "Wind dynamics in the extratropical summer hemisphere are generally slow" → Unclear what is meant by this statement? Do you want to say that winds in summer are slower? Or that they are not changing as much?

We tried to make this point more clear by saying 'Stratospheric wind speeds in the extratropical summer hemisphere are generally slow compared to the winter hemisphere.'

- P6,L27: "we calculated the horizontal distances as Cartesian distances of the air parcel

AIRS | 2015-01-01, 01:30 LT

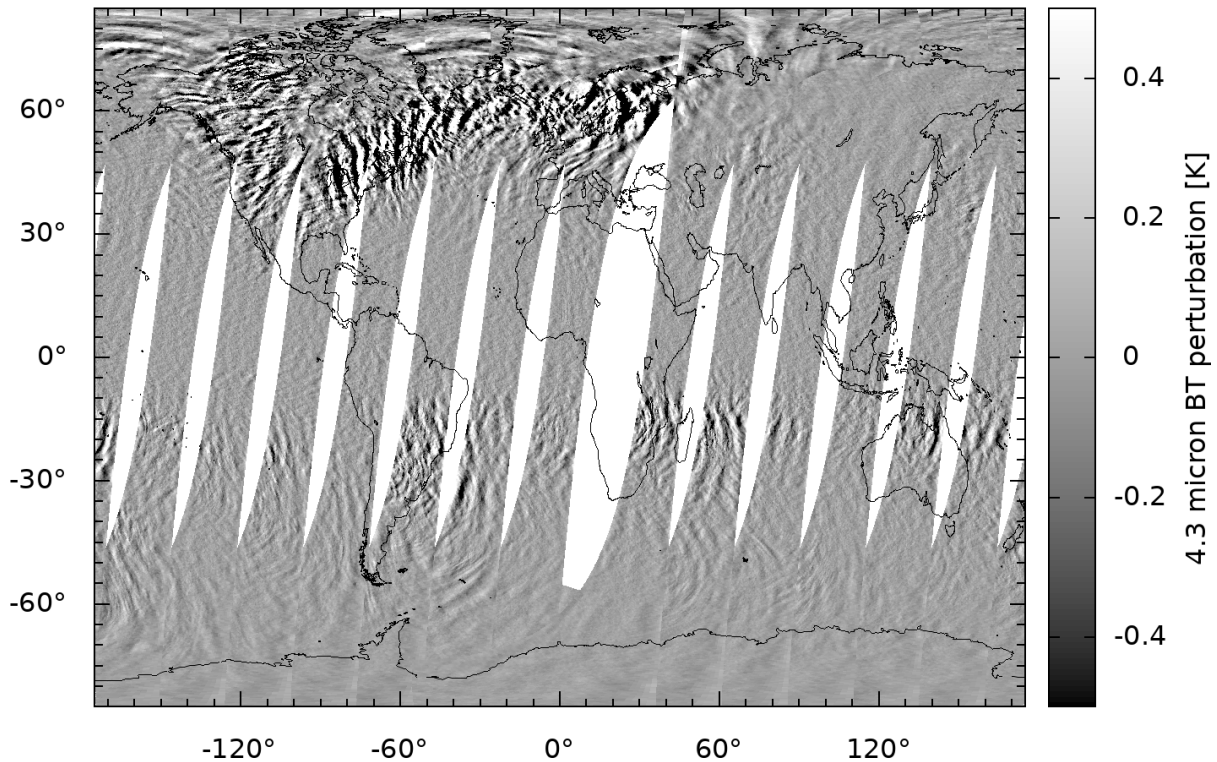

Figure 6: Atmospheric InfraRed Sounder (AIRS/Aqua) satellite observations of stratospheric gravity waves (following Hoffmann et al., 2013).

positions projected to the Earth surface” → It is not completely clear how the distance is calculated. What are Cartesian distances on a sphere?

To clarify we rephrased this: ‘To calculate the horizontal distances we converted the spherical coordinates of the air parcels to Cartesian coordinates and calculated the Euclidean distance of the Cartesian coordinates.’ Note that this approach approximates spherical distances quite well, as long as those distance are smaller than about 3000 km.

- P8,L15: ”it needs to be pointed out that this is undersampling” → ”this is still undersampling”

We rephrased accordingly.

- Figure 1: In the upper-right panel the vertical wind velocity is shown. A rather large-scale wave pattern is discernible over northern Europe. I wonder whether this pattern is physical, or some kind of numerical artifact? The amplitude of the waves is rather small, as expected in the stratosphere.

Although we can not exclude that some numerical artifacts of the ECMWF IFS model are present in the vertical velocity map, there is evidence that the wave structures are

physical, because they occur in the same places where an infrared nadir sounder observed stratospheric gravity waves. See Figure 6 in this reply.

- Figure 5,6: I wonder whether it would be better to reduce the number of panels, e.g., by only showing the results for the northern hemisphere? Of course, it would (for instance) also be interesting to compare the northern UT/LS with the southern UT/LS. But, at the moment the UT/LS is defined by means of fixed heights (8-16 km) and it is not clear whether the tropospheric fraction for the southern hemisphere is the same as for the northern hemisphere. If not, and this will certainly be the case to some degree, the two hemispheres are not really comparable.

The intention of our Figures 5 and 6 is to give a comprehensive impression of spatial and temporal variability of transport deviations on the global scale. Although the altitude classification namely in the UT/LS region does not exactly reflect the real tropospheric and stratospheric fractions and their hemispheric variations, it still shows substantial differences between the hemispheres.

- P11,L1-10: The values listed in the text are better presented as a table.

We added a new table (Table 2) which comprises the values originally given on page 11, lines 1-8.

- P11,L29-30: "The tropospheric mid-latitudes were expected to cause the largest errors, because the most complex wind systems occur in this region due to a larger land surface ratio and more complex orography" → What do you mean with 'complex wind systems'? What is the 'land surface ratio' - most likely you mean 'land-sea ratio'? Further, it is rather unspecific to attribute the flow variability to the orography and/or the land-to-sea fraction.

We decided to rephrase the whole paragraph and would like to refer to our reply to minor remark #14 of reviewer #1. 'Land surface ratio' has been changed to 'land-sea ratio'.

- P11,L33: Again, what is a 'complex wind pattern' and why is the turbulence higher in this region? I guess that the authors point to the higher jet variability, i.e., its north-south meandering structure. I would suggest to add some references to climatologies that quantify this variability.

Please see our reply to minor remark #14 of reviewer #1.

- P12, L17: "As a rough indication for inter-annual variability" → This is indeed a very rough measure for inter-annual variability! If I hear 'interannual variability', I would expect a study covering at least 10 years. Hence, I would simply say that the two years 2014 and 2015 are compared, and that they differ substantially – indicating that the inherent flow properties have a considerable impact on the outcome.

We share your concern. Although our study used two years to give an initial indication of inter-annual variability, we would rather speak of differences between the two test years

instead of an inter-annual variability. We changed the text accordingly.

## Executive editor comment

Dear authors,

in my role as Executive editor of GMD, I would like to bring to your attention our Editorial version 1.1:

<http://www.geosci-model-dev.net/8/3487/2015/gmd-8-3487-2015.html>

This highlights some requirements of papers published in GMD, which is also available on the GMD website in the ‘Manuscript Types’ section:

[http://www.geoscientific-model-development.net/submission/manuscript\\_types.html](http://www.geoscientific-model-development.net/submission/manuscript_types.html)

In particular, please note that for your paper, the following requirements have not been met in the Discussions paper:

- The main paper must give the model name and version number (or other unique identifier) in the title.
- If the model development relates to a single model then the model name and the version number must be included in the title of the paper. If the main intention of an article is to make a general (i.e. model independent) statement about the usefulness of a new development, but the usefulness is shown with the help of one specific model, the model name and version number must be stated in the title. The title could have a form such as, “Title outlining amazing generic advance: a case study with Model XXX (version Y)”.

So please add the model name and/or its acronym (MPTRAC) and its respective version number in the title of your article in your revised submission to GMD.

Yours, Astrid Kerkweg

We rephrased the title of the manuscript according to suggestions made by reviewer #1. The name of the model, MPTRAC, was included. Unfortunately, a specific version number was not assigned for the code used here. However, to allow others to reproduce our results, we made the code available in a separate repository, as described in the revised section on ‘code and data availability’ in our manuscript.

## References

- Heng, Y., Hoffmann, L., Griessbach, S., Rößler, T., and Stein, O.: Inverse transport modeling of volcanic sulfur dioxide emissions using large-scale simulations, *Geosci. Model Dev.*, 9, 1627–1645, 2016.
- Hoffmann, L., Xue, X., and Alexander, M. J.: A global view of stratospheric gravity wave hotspots located with Atmospheric Infrared Sounder observations, *J. Geophys. Res.*, 118, 416–434, 2013.
- Hoffmann, L., Rößler, T., Griessbach, S., Heng, Y., and Stein, O.: Lagrangian transport simulations of volcanic sulfur dioxide emissions: impact of meteorological data products, *J. Geophys. Res.*, doi: 10.1002/2015JD023749, 2016.
- Maryon, R. and Heasman, C.: The accuracy of plume trajectories forecast using the UK Meteorological Office operational forecasting models and their sensitivity to calculation schemes, *Atmos. Environment*, 22, 259–272, 1988.
- Seibert, P.: Convergence and accuracy of numerical methods for trajectory calculations, *J. Appl. Met.*, 32, 558–566, 1993.
- Walmsley, J. L. and Mailhot, J.: On the numerical accuracy of trajectory models for long-range transport of atmospheric pollutants, *Atmosphere-Ocean*, 21, 14–39, 1983.
- Woollings, T., Czuchnicki, C., and Franzke, C.: Twentieth century North Atlantic jet variability., *Quart. J. Roy. Meteorol. Soc.*, 140, 783791, doi: 10.1002/qj.2197, 2014.
